# Supplementary material for: Artificial lithium fluoride surface coating on silicon negative electrodes for the inhibition of electrolyte decomposition in lithium-ion batteries: visualization of a solid electrolyte interphase using in situ AFM
Source: Royal Society of Chemistry journal article supplement (doi:10.1039/c8nr05354e), 2018-01-01
Supplement: c8nr05354e1.pdf [file c8nr05354e1.pdf]

Supplementary Information for

**Artificial lithium fluoride surface coating on silicon  
negative electrodes for the inhibition of electrolyte  
decomposition in lithium-ion batteries:  
visualization of solid electrolyte interphase by in-  
situ AFM**

Masakazu Haruta\*, Yuki Kijima, Ryuya Hioki, Takayuki Doi, Minoru Inaba

Doshisha University, Tatara-Miyakodani, Kyotanabe, Kyoto 610-0321, Japan

\*Corresponding author: mharuta@mail.doshisha.ac.jp (M. Haruta)

## 1. Characterization of the as-deposited Si thin film

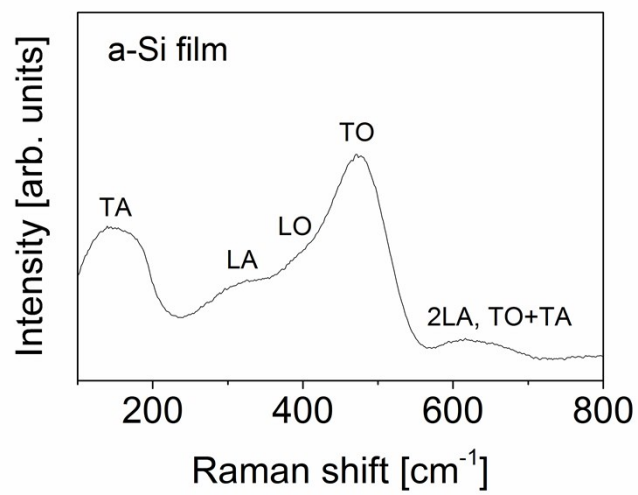

**Figure S1.** Raman spectrum of the as-deposited Si thin film.

## 2. Surface morphology of the as-received mirror-polished Cu substrate and the as-deposited Si thin films

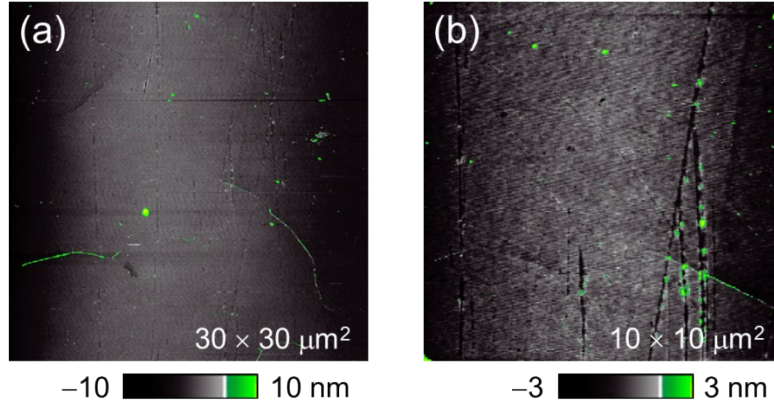

**Figure S2.** AFM images of the as-received mirror-polished Cu substrate. The scan areas and the height ranges are: (a)  $30 \times 30 \mu\text{m}^2$  and  $\pm 10$  nm, and (b)  $10 \times 10 \mu\text{m}^2$  and  $\pm 3$  nm, respectively.

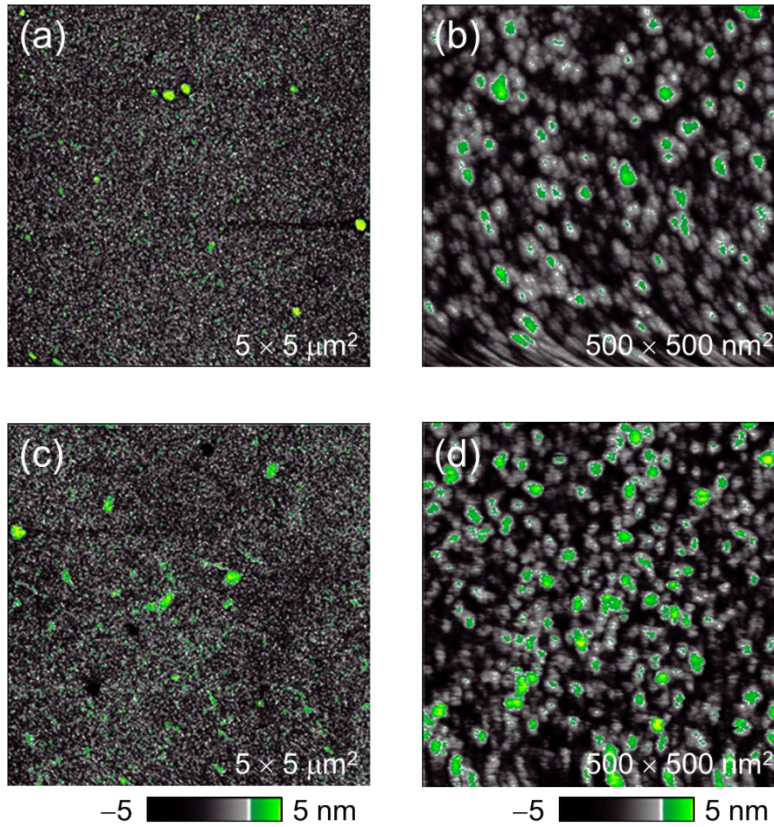

**Figure S3.** AFM images of as-deposited Si thin films (a, b) without and (c, d) with 4-nm-thick LiF. The scan areas are: (a, c)  $5 \times 5 \mu\text{m}^2$  and (b, d)  $500 \times 500 \text{ nm}^2$ .

### 3. Cyclabilities of Si thin-film electrodes coated with LiF layers

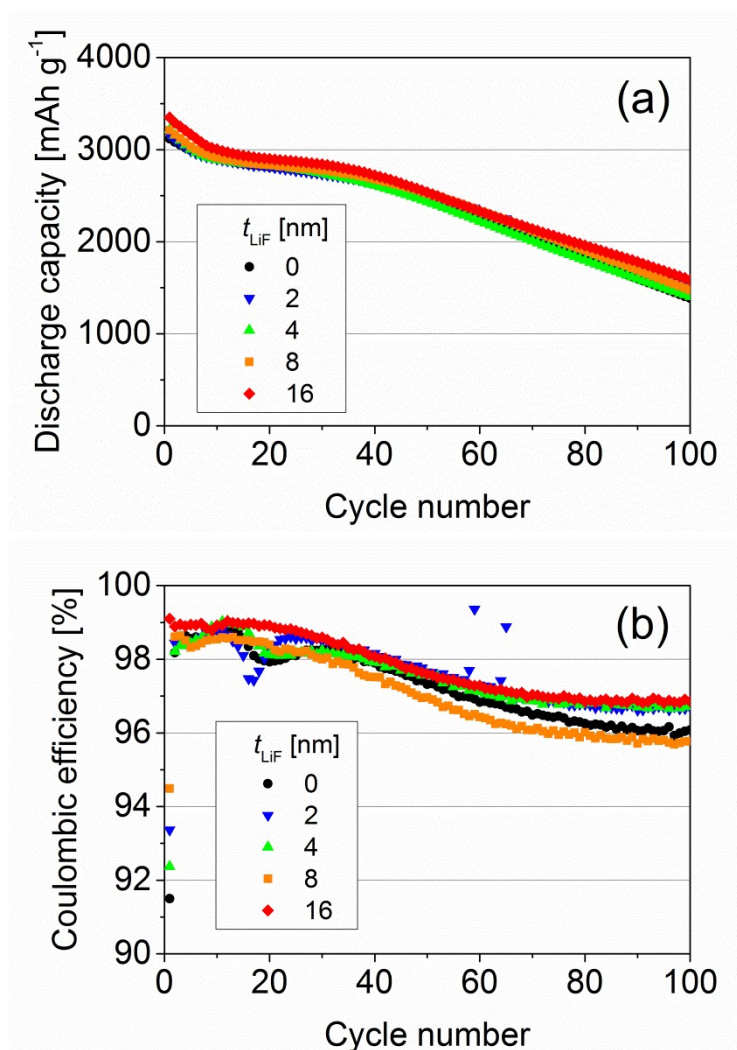

**Figure S4.** (a) Discharge capacities and (b) Coulombic efficiencies of Si thin-film electrodes with LiF layers of different thickness ( $t_{\text{LiF}} = 0, 2, 4, 8, \text{ and } 16 \text{ nm}$ ) in 1 M  $\text{LiPF}_6/\text{EC}+\text{DEC}$  electrolyte, as functions of cycle number.

#### 4. Surface analyses of Si thin-film electrodes after cycling

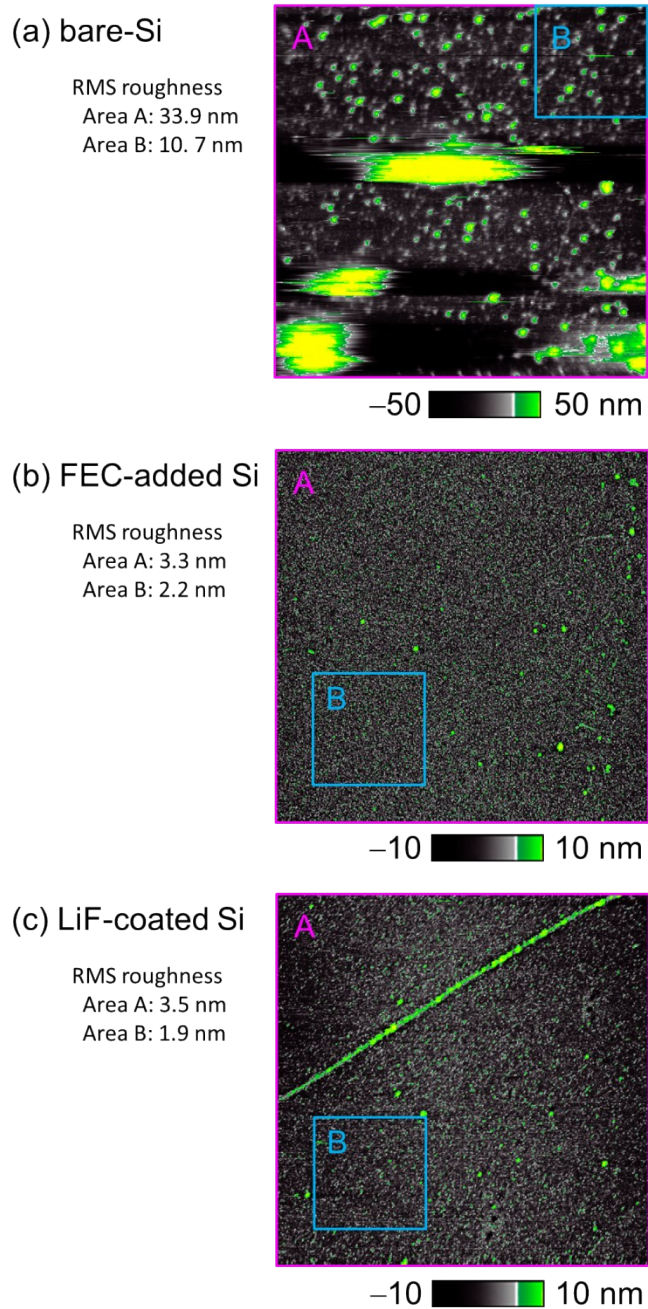

**Figure S5.** Root-mean-square surface roughness of Si thin-film electrodes (a,b) without and (c) with 4-nm-thick LiF after two cycles in 1 M LiTFSI/EC+DEC electrolytes (a,c) without and (b) with 10-wt.% FEC. Analyzed areas of A and B are  $10 \times 10 \mu\text{m}^2$  and  $3 \times 3 \mu\text{m}^2$ , respectively.
